# Supplementary material for: Plasma YKL-40 as a biomarker for bevacizumab efficacy in patients with newly diagnosed glioblastoma in the phase 3 randomized AVAglio trial
Source: PubMed Central journal article supplement (PMC5805511; doi:10.18632/oncotarget.22886), 2017-12-04
Supplement: oncotarget-09-6752-s001.pdf [file oncotarget-09-6752-s001.pdf]

# Plasma YKL-40 as a biomarker for bevacizumab efficacy in patients with newly diagnosed glioblastoma in the phase 3 randomized AVAglio trial

## SUPPLEMENTARY MATERIALS

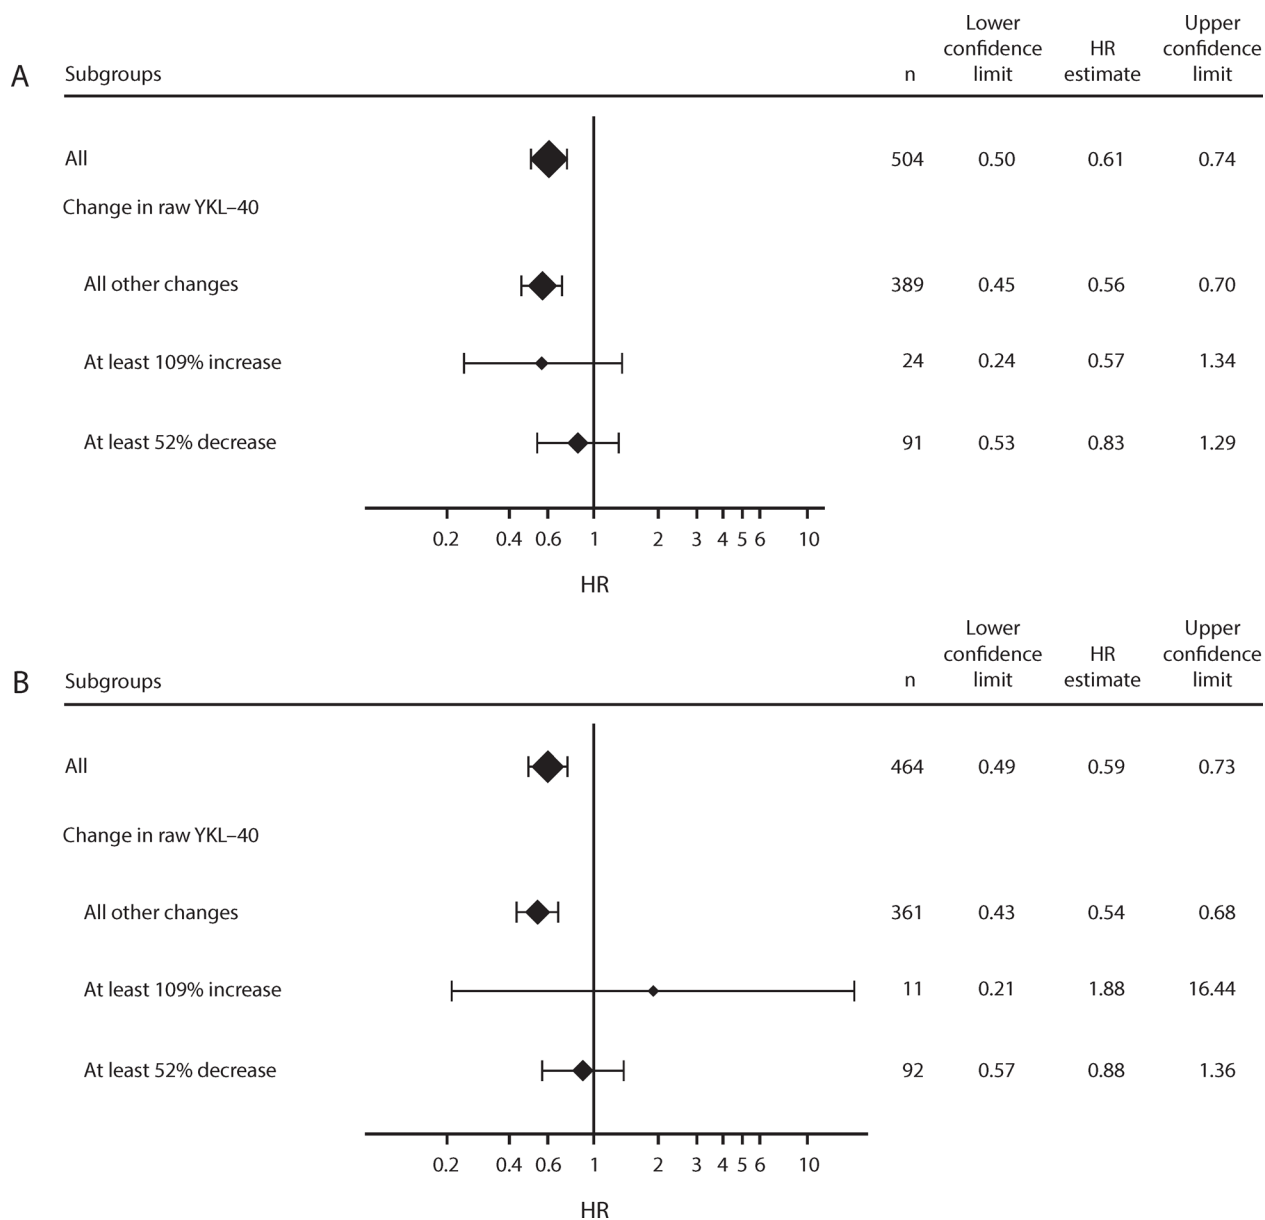

**Supplementary Figure 1:** Forest plot of progression-free survival according to relative change in raw YKL-40 level (A) from baseline to second cycle or (B) from baseline to the end of combination treatment. Abbreviation: HR, hazard ratio. The cut offs for percentage of change are based on prior studies of plasma YKL-40 measurement variability and correspond to the points where changes can be considered true changes [1].

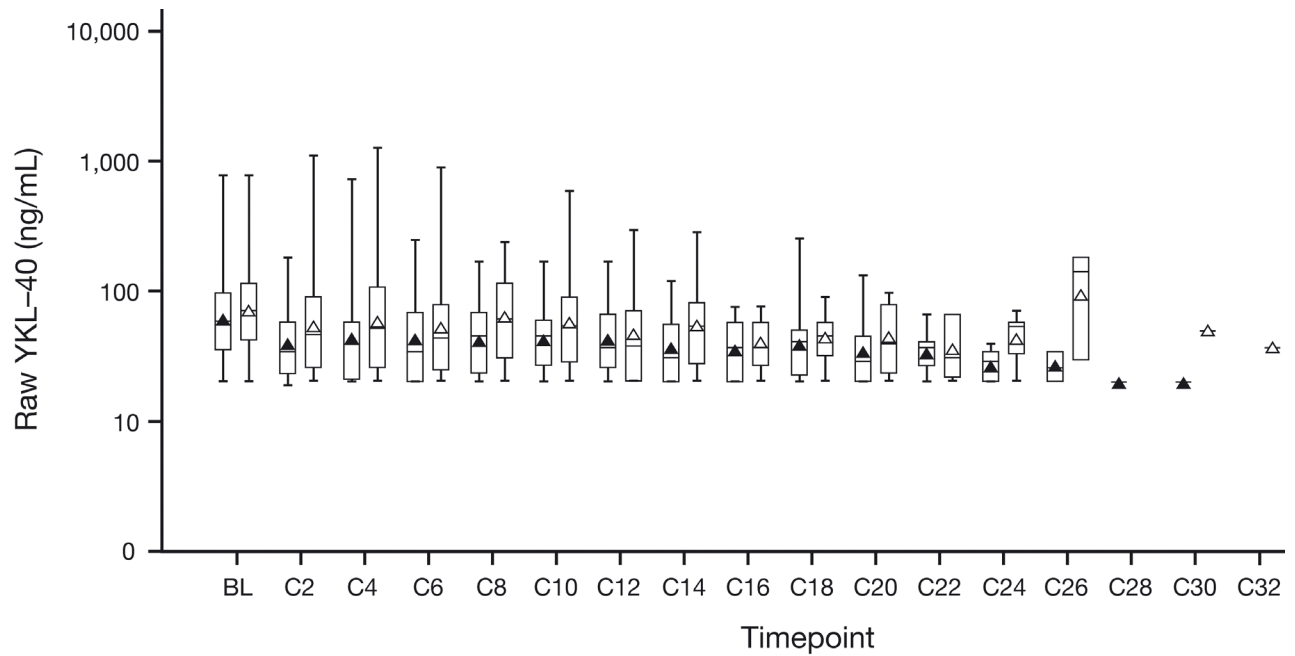

No. at risk

|                |     |     |     |    |    |    |    |    |    |    |    |   |   |   |   |   |
|----------------|-----|-----|-----|----|----|----|----|----|----|----|----|---|---|---|---|---|
| △ Plb + RT/TMZ | 284 | 77  | 61  | 55 | 30 | 33 | 36 | 20 | 15 | 13 | 9  | 6 | 5 | 3 | 1 | 1 |
| ▲ BEV + RT/TMZ | 279 | 133 | 102 | 96 | 47 | 37 | 36 | 24 | 23 | 16 | 11 | 7 | 6 | 2 | 1 | 1 |

**Supplementary Figure 2: Raw Plasma YKL-40 (ng/mL) at different time points during treatment and follow-up.**  
Abbreviations: BEV, bevacizumab; BL, baseline; C, cycle (monotherapy); Plb, placebo; RT/TMZ, radiotherapy and temozolomide.

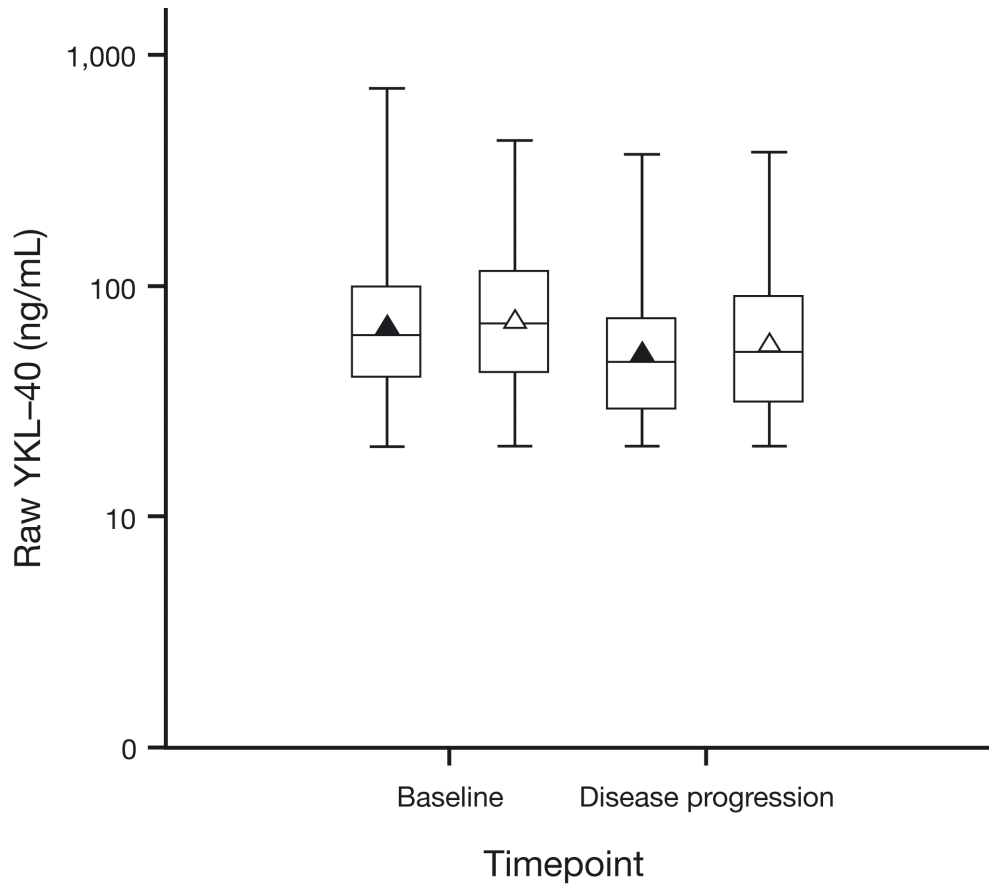

| No. at risk    |              |
|----------------|--------------|
| △ Plb + RT/TMZ | 137      137 |
| ▲ BEV + RT/TMZ | 89      89   |

**Supplementary Figure 3: Raw Plasma YKL-40 (ng/mL) at baseline and at time of progression.** Abbreviations: BEV, bevacizumab; Plb, placebo; RT/TMZ, radiotherapy and temozolomide.

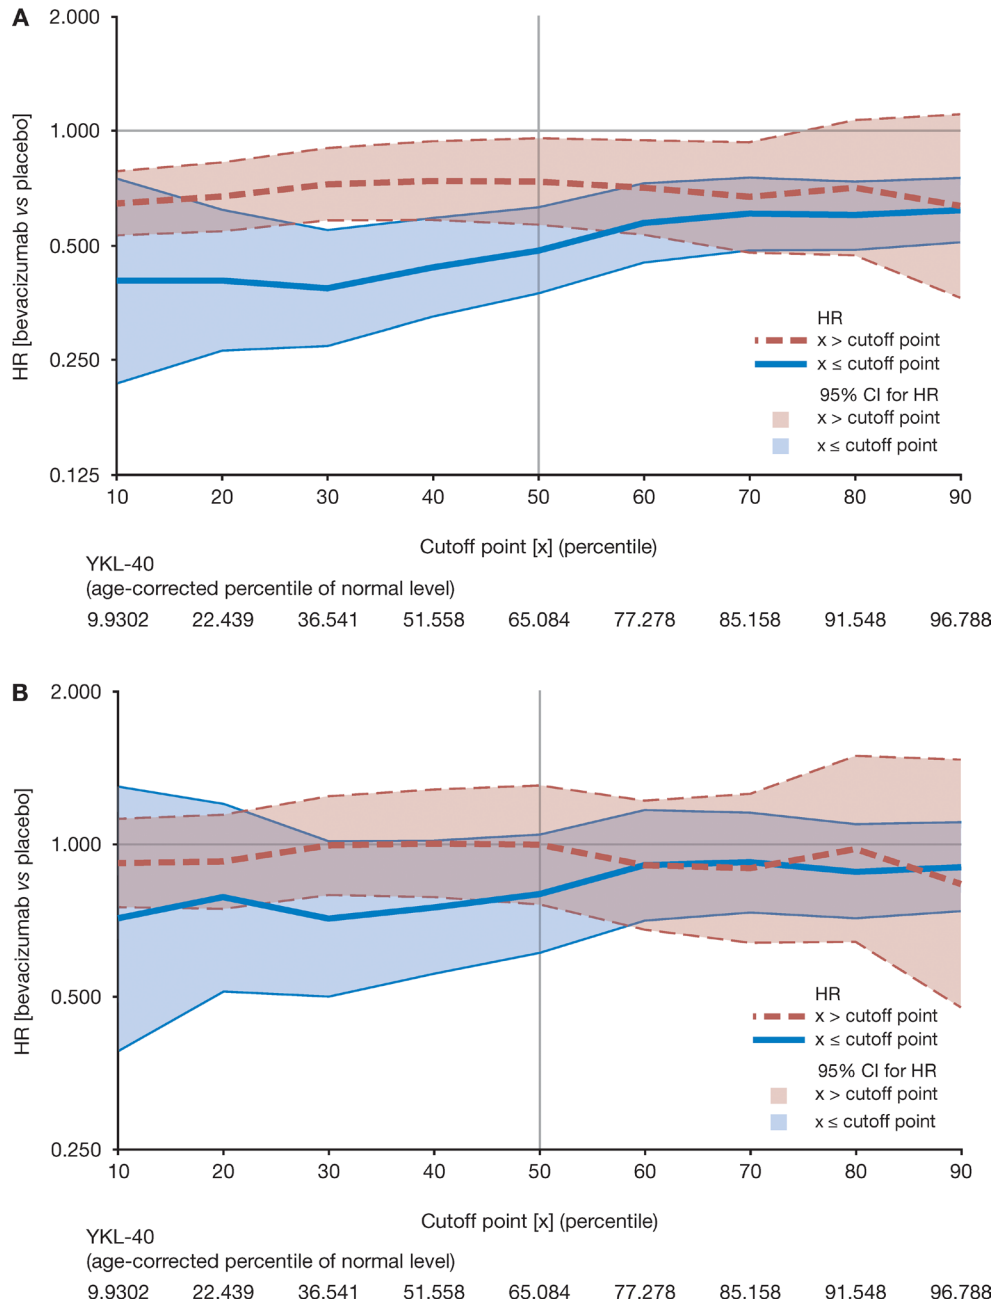

**Supplementary Figure 4:** Effect of bevacizumab on progression-free-survival (A) and overall survival (B) as a function of baseline plasma YKL-40 cut-off. Hazard ratios (HR) with 95% confidence intervals for the comparison between bevacizumab and placebo are shown for cohorts of patients with plasma YKL-40 above or below a given cut-off value of YKL-40. Population percentiles are shown on the x-axis and the corresponding age-corrected YKL-40 percentiles of normal value are shown below.

## REFERENCES

1. Johansen JS, Lottenburger T, Nielsen HJ, Jensen JE, Svendsen MN, Kollerup G, Christensen IJ. Diurnal, weekly, and long-time variation in serum concentrations of YKL-40 in healthy subjects. *Cancer Epidemiol Biomarkers Prev.* 2008;17:2603–2608.
